# Supplementary material for: A Cell Cycle and Nutritional Checkpoint Controlling Bacterial Surface Adhesion
Source: PubMed Central journal article supplement (PMC3900383; doi:10.1371/journal.pgen.1004101), 2014-01-23
Supplement: pgen.1004101.s008.pdf [file pgen.1004101.s008.pdf]

**Table S1: Spontaneous mutations that suppress the *hfiA* overexpression phenotype.**

| <i>Group 1: Plasmid mutations in pMT805-hfiA identified by targeted sequencing of the plasmid</i> |                                        |                                      |                            |                                  |                            |
|---------------------------------------------------------------------------------------------------|----------------------------------------|--------------------------------------|----------------------------|----------------------------------|----------------------------|
| Type of change                                                                                    | Nucleotide change <sup>1</sup>         |                                      | Coding change <sup>2</sup> | Notes <sup>3</sup>               |                            |
| Nonsense SNP                                                                                      | C16T                                   |                                      | R6stop                     |                                  |                            |
| Nonsense; 1 bp insert                                                                             | TT(23-24)TTT                           |                                      | D9stop                     | Partially active                 |                            |
| Nonsense SNP                                                                                      | C28T                                   |                                      | Q10stop                    | Partially active                 |                            |
| Nonsense SNP                                                                                      | C31T                                   |                                      | R11stop                    |                                  |                            |
| 2 non-synonymous SNPs                                                                             | T68A, T71A                             |                                      | I23N, L24H                 |                                  |                            |
| Nonsense SNP                                                                                      | C73T                                   |                                      | Q25stop                    |                                  |                            |
| Non-synonymous SNP                                                                                | T101G                                  |                                      | L34R                       |                                  |                            |
| Non-synonymous SNP                                                                                | T104A                                  |                                      | V35E                       |                                  |                            |
| In-frame 15 bp duplication                                                                        | 2X C109-G123                           |                                      | 2X(L37-A42)                | Dominant                         |                            |
| Frameshift; 1 bp insert                                                                           | CG(117-118)CAG                         |                                      | Adds 68 codons after P39   |                                  |                            |
| Frameshift; 82 bp deletion                                                                        | ΔG123-C214                             |                                      | Adds 30 codons after A40   |                                  |                            |
| Nonsense SNP                                                                                      | T155A                                  |                                      | L52stop                    |                                  |                            |
| Frameshift; 1 bp insert                                                                           | C <sub>6</sub> (204-209)C <sub>7</sub> |                                      | Adds 41 codons after P66   |                                  |                            |
| <i>Group 2: Chromosomal mutations</i>                                                             |                                        |                                      |                            |                                  |                            |
| Mutant                                                                                            | Locus                                  | Function                             | Type of change             | Nucleotide change <sup>4,5</sup> | Coding change <sup>5</sup> |
| <i>Group 2a: Mutations mapped by whole genome sequencing</i>                                      |                                        |                                      |                            |                                  |                            |
| 256-39                                                                                            | CC_0095                                | UDP-glycosyl transferase             | SNP                        | T778C                            | C260R                      |
|                                                                                                   | CC_2868                                | NeuB, N-acetylneuraminatase synthase | SNP                        | T3118669C                        | 5' non-coding              |
| 261-15                                                                                            | CC_0095                                | UDP-glycosyl transferase             | 2 SNPs                     | T778C, T790C                     | C260R, W264R               |
|                                                                                                   | CC_2864                                | ArsR family transcription regulator  | SNP                        | A194G                            | H65R                       |
| <i>Group 2b: Mutations identified by targeted sequencing of only CC_0095 locus</i>                |                                        |                                      |                            |                                  |                            |
| 256-112                                                                                           | CC_0095                                | UDP-glycosyl transferase             | SNP                        | T743G                            | L248R                      |
| 256-177                                                                                           | CC_0095                                | UDP-glycosyl transferase             | Deletion:<br>68 bp         | ΔT800-G867                       | Frame shift after<br>L266  |
| 256-185                                                                                           | CC_0095                                | UDP-glycosyl transferase             | Duplication:<br>30 bp      | 2X T736-G765                     | 2X F246-L255               |

<sup>1</sup>Nucleotide position is indicated with reference to the reannotated translation start site corresponding to position 938825 in the NA1000 reference genome (Genbank accession CP001340); see also Figure S3.

<sup>2</sup>Amino acid residues are indicated with reference to the reannotated HfiA primary sequence; see also Figure S3.

<sup>3</sup>*Partially active*: Surface binding, holdfast development and rosette formation not fully restored to WT / pMT805 (EV) levels in these mutants. *Dominant*: This mutation leads to enhanced surface binding, holdfast development and rosette formation compared to WT / pMT805 (EV) suggesting it may also affect endogenously expressed HfiA.

<sup>4</sup>Coding changes are in gene coordinates; coordinate of non-coding change corresponds to position in the NA1000 reference genome.

<sup>5</sup>CC\_0095 coordinates correspond to the start codon annotated in the NA1000 reference genome (CCNA\_0094)
