# Supplementary material for: A Cell Cycle and Nutritional Checkpoint Controlling Bacterial Surface Adhesion
Source: PubMed Central journal article supplement (PMC3900383; doi:10.1371/journal.pgen.1004101), 2014-01-23
Supplement: pgen.1004101.s013.pdf [file pgen.1004101.s013.pdf]

**Table S6: Plasmids, primers and strains used**

| <b><i>E. coli</i> strains with plasmids</b>   |                                                                      |                                                                                                                                                       |                            |
|-----------------------------------------------|----------------------------------------------------------------------|-------------------------------------------------------------------------------------------------------------------------------------------------------|----------------------------|
| <b>Strain #</b>                               | <b>Genotype</b>                                                      | <b>Comments / primers to amplify inserted sequence</b>                                                                                                | <b>Source</b>              |
| FC929                                         | TOP10                                                                | Cloning strain                                                                                                                                        | Invitrogen                 |
| FC3                                           | MT607 / pRK600                                                       | Helper strain for tri-parental matings                                                                                                                | (Finan et al., 1986)       |
| FC803                                         | Rosetta (DE3) pLysS                                                  | Strain for protein expression from T7 promoter                                                                                                        | Novagen                    |
| <b><i>Caulobacter</i> expression plasmids</b> |                                                                      |                                                                                                                                                       |                            |
| FC339                                         | TOP10 / pMT585 (pXGFPC-2)                                            | Integrates at the xylose locus, KanR                                                                                                                  | (Thanbichler et al., 2007) |
| FC338                                         | TOP10 / pMT528 (pVCHYC-1)                                            | Integrates at the vanillate locus, Spec/StrepR                                                                                                        | (Thanbichler et al., 2007) |
| MTLS 4389                                     | TOP10 / pMT680 (pXGFPC-6)                                            | Integrates at the xylose locus, ChloR                                                                                                                 | (Thanbichler et al., 2007) |
| MTLS 4322                                     | TOP10 / pMT581 (pXMCS-4)                                             | Integrates at native locus, xylose-inducible promoter, GentR                                                                                          | (Thanbichler et al., 2007) |
| MTLS 4423                                     | TOP10 / pMT805 (pBMCS-6)                                             | Replicating plasmid (mid-copy, BBR origin) with xylose-inducible promoter, ChlorR                                                                     | (Thanbichler et al., 2007) |
| MTLS 4421                                     | TOP10 / pMT464 (pBMCS-2)                                             | Replicating plasmid (mid-copy, BBR origin) with xylose-inducible promoter, KanR                                                                       | (Thanbichler et al., 2007) |
| MTLS 4322                                     | TOP10 / pMT666 (pVENC-2)                                             | Integrates at native locus and generates a C-terminal fusion to venus, KanR                                                                           | (Thanbichler et al., 2007) |
| MTLS 4424                                     | TOP10 / pMT630 (pBVMCS-2)                                            | Replicating plasmid (low copy, RK2 origin) with vanillate-inducible promoter, KanR                                                                    | (Thanbichler et al., 2007) |
| FC364                                         | TOP10 / pMT585- <i>lovR</i>                                          |                                                                                                                                                       | (Purcell et al., 2007)     |
| FC432                                         | TOP10 / pMT528- <i>lovK</i>                                          |                                                                                                                                                       | (Purcell et al., 2007)     |
| FC1361                                        | TOP10 / pMT680- <i>hfiA</i>                                          | F: catatgTCGGGCCATTTATTGAG<br>R: ggtaccGTCGGTCGTGCGCATAGT                                                                                             | This work                  |
| pAF465                                        | TOP10 / pMT581- <i>hfiA</i>                                          | F: catatgTCGGGCCATTTATTGAG<br>R: ggtacctAGAGCGTTTGCGGTTTC                                                                                             | This work                  |
| pAF463                                        | TOP10 / pMT805- <i>hfiA</i>                                          | F: catatgTCGGGCCATTTATTGAG<br>R: ggtaccGTCGGTCGTGCGCATAGT                                                                                             | This work                  |
| pAF493                                        | TOP10 / pMT680- <i>staR</i>                                          | F: aatacatatgGCTTCCATGGGCAAC<br>R: aataggtaccGTACGCGGTGGTCCGACTTTA                                                                                    | This work                  |
| pAF498                                        | TOP10 / pMT630- <i>hfsJ</i>                                          | F: atatcatatgTTCGTTCTCAAGAGC<br>R: aataggtaccCCTGAAGTTCAACAGCAT                                                                                       | This work                  |
| FC2016                                        | TOP10 / pMT464- <i>wecG</i> ( <i>E.c.</i> )                          | F: atatcatatgAATAACAACACCACGGC<br>R: atatgaattcTCATAGGTTGCCGGTGTAGT                                                                                   | This work                  |
| FC2017                                        | TOP10 / pMT464- <i>tagA</i> ( <i>B.s.</i> )                          | F: atatcatatgCAAACAGAGACTATTACACA<br>R: atatgaattcTTAAATCTGTTTTGTATGATCTTTTTTC                                                                        | This work                  |
| FC2018                                        | TOP10 / pMT666-P <sub><i>hfsJ</i></sub> - <i>hfsJ</i> - <i>venus</i> | F: atatcatatgTGACGCTCTTGAAGTCGTGCG<br>R: atatgaattcGAGCGCGCCGCTCGTTG                                                                                  | This work                  |
| <b>Allele replacement plasmids</b>            |                                                                      |                                                                                                                                                       |                            |
| FC55                                          | DH10B / pNPTS138                                                     | Allele replacement plasmid, KanR, SacB                                                                                                                | M.R.K. Alley               |
| FC1357                                        | TOP10 / pNPTS138- $\Delta$ <i>hfiA</i>                               | UP F: ggatccGATGTGGCAGTTCCTGTTGA<br>UP R+: AGCGGCGAAACCTCAATAAATGGCCCGACAC<br>DN F+: CATTTATTGAGGTTTCGCCGCTCGAAGAT<br>DN R: gaatTCCAGCTCGACGGATTG     | This work                  |
| FC725                                         | TOP10 / pNPTS138- $\Delta$ <i>hfsA</i>                               | UP F: gaattcCGGCCCACGAACACCTTCAA<br>UP R: ggatccGATCCAGGCGCTCGTCGACAT<br>DN F: ggatccCGGTGAGCGCTTTGGTCCG<br>DN R: aagcttGCAGTCCACGACGATGACCT          | This work                  |
| pAF491                                        | TOP10 / pNPTS138- $\Delta$ <i>staR</i>                               | UP F: attactcagATCACCTCCCAGTTCGACAG<br>UP R+: ACTTGGCCATGTCGTTGCCATGGAAG<br>DN F+: CAACGACATGGCCAAGTCGCTGAACG<br>DN R: attagaattcCGATGAAGATCTCATTGACG | This work                  |
| pAF494                                        | TOP10 / pNPTS138- $\Delta$ <i>hfsJ</i>                               | UP F: atatgaattcAAGGAACCTGGCCAACCTGAT<br>UP R+: GACAGCCTCTGCTCTTGAGGAACGA<br>DN F+: GAGCAGAGGCTGTCCAGACGCTCTAC<br>DN R: atatctgcaGACCATCGTTTCTTCT     | This work                  |

|                                                                   |                                                      |                                                                                                                                                             |                           |
|-------------------------------------------------------------------|------------------------------------------------------|-------------------------------------------------------------------------------------------------------------------------------------------------------------|---------------------------|
| pAF456                                                            | TOP10 / pNPTS138- <i>hfiA</i> ( $\Delta$ codonC)     | UP F: ggatccGATGTGGCAGTTCCTGTTGA<br>$\Delta$ c UP R+: TCGGCTCACTGACAAGATCCT<br>$\Delta$ c DN F+: TTGAGCGCGGACAGGATcTTG<br>DN R: gaatTCCAGCTCGACGGATTG       | This work                 |
| pAF457                                                            | TOP10 / pNPTS138- <i>hfiA</i> ( $\Delta$ codonD)     | UP F: ggatccGATGTGGCAGTTCCTGTTGA<br>$\Delta$ d UP R+: GGCTCACTGAgAgCATCCTG<br>$\Delta$ d DN F+: CGGACAGGATGcTcTCAGTG<br>DN R: gaatTCCAGCTCGACGGATTG         | This work                 |
| pAF460                                                            | TOP10 / pNPTS138- <i>hfiA</i> ( $\Delta$ codonE)     | UP F: ggatccGATGTGGCAGTTCCTGTTGA<br>$\Delta$ e UP R+: GGCTgACTGACAACATCCTG<br>$\Delta$ e DN F+: CGGACAGGATGTTGTcCAGTc<br>DN R: gaatTCCAGCTCGACGGATTG        | This work                 |
| pAF458                                                            | TOP10 / pNPTS138- <i>hfiA</i> ( $\Delta$ codonC,D)   | UP F: ggatccGATGTGGCAGTTCCTGTTGA<br>$\Delta$ c,d UP R+: GGCTCACTGAgAggATCCTG<br>$\Delta$ c,d DN F+: CGGACAGGATccTcTCAGTG<br>DN R: gaatTCCAGCTCGACGGATTG     | This work                 |
| pAF478                                                            | TOP10 / pNPTS138- <i>hfiA</i> ( $\Delta$ codonC,E)   | UP F: ggatccGATGTGGCAGTTCCTGTTGA<br>$\Delta$ c,e UP R+: TCGGCTgACTGACAAGATCCT<br>$\Delta$ c,e DN F+: TTGAGCGCGGACAGGATcTTG<br>DN R: gaatTCCAGCTCGACGGATTG   | This work                 |
| pAF479                                                            | TOP10 / pNPTS138- <i>hfiA</i> ( $\Delta$ codonD,E)   | UP F: ggatccGATGTGGCAGTTCCTGTTGA<br>$\Delta$ d,e UP R+: GGCTgACTGAgAgCATCCTG<br>$\Delta$ d,e DN F+: CGGACAGGATGcTcTCAGTc<br>DN R: gaatTCCAGCTCGACGGATTG     | This work                 |
| pAF489                                                            | TOP10 / pNPTS138- <i>hfiA</i> ( $\Delta$ codonC,D,E) | UP F: ggatccGATGTGGCAGTTCCTGTTGA<br>$\Delta$ c,d,e UP R+: GGCTgACTGAgTggATCCTG<br>$\Delta$ c,d,e DN F+: CGGACAGGATccTcTCAGTc<br>DN R: gaatTCCAGCTCGACGGATTG | This work                 |
| FC2099                                                            | TOP10 / pNPTS138- <i>hfsJ</i> ( $\Delta$ codonA)     | UP F: attagaattcGATCGGCCAGTTCACAAGG<br>$\Delta$ A UP R: CTCCGAGAATaTCTCCAAG<br>$\Delta$ A DN F: CTTGGAGAtATTCTGCGGAG<br>DN R: tttctgcaGACCATCGTTTCTTCT      | This work                 |
| FC2101                                                            | TOP10 / pNPTS138- <i>hfsJ</i> ( $\Delta$ codonB)     | UP F: attagaattcGATCGGCCAGTTCACAAGG<br>$\Delta$ B UP R: CTGCGGAGATaTTCGTTC<br>$\Delta$ B DN F: GGAACGAAtATCTCCGAG<br>DN R: tttctgcaGACCATCGTTTCTTCT         | This work                 |
| pAF495                                                            | TOP10 / pNPTS138- <i>hfsJ</i> (C260R)                | UP F: attagaattcGATCGGCCAGTTCACAAGG<br>T778C UP R+: GATGCgGTAGCGGAAGAAC<br>T778C DN F+: GTTCTCCGCTACcGCATC<br>DN R: tttctgcaGACCATCGTTTCTTCT                | This work                 |
| pAF497                                                            | TOP10 / pNPTS138- <i>hfsJ</i> (C260R, W264R)         | UP F: attagaattcGATCGGCCAGTTCACAAGG<br>T778,790C UP R+: CgGGGCTCGATGCgGTAG<br>T778,790C DN F+: TAcCGATCGAGCCcGGT<br>DN R: tttctgcaGACCATCGTTTCTTCT          | This work                 |
| pAF524                                                            | TOP10 / pNPTS138- <i>hfsJ</i> (L248R)                | UP F: attagaattcGATCGGCCAGTTCACAAGG<br>DN R: tttctgcaGACCATCGTTTCTTCT<br>Amplified allele from sup256-112                                                   |                           |
| pAF525                                                            | TOP10 / pNPTS138- <i>hfsJ</i> (L266fs)               | UP F: attagaattcGATCGGCCAGTTCACAAGG<br>DN R: tttctgcaGACCATCGTTTCTTCT<br>Amplified allele from sup256-177                                                   |                           |
| pAF526                                                            | TOP10 / pNPTS138- <i>hfsJ</i> (2XF246-L255)          | UP F: attagaattcGATCGGCCAGTTCACAAGG<br>DN R: tttctgcaGACCATCGTTTCTTCT<br>Amplified allele from sup256-185                                                   |                           |
| <b>Transcription or translational <i>lacZ</i> fusion plasmids</b> |                                                      |                                                                                                                                                             |                           |
| FC54                                                              | S17-1 / pRKlac290                                    | Plasmid for <i>lacZ</i> transcriptional fusions                                                                                                             | (Gober and Shapiro, 1992) |
| pAF427                                                            | TOP10 / pRKlac290- <i>PhfiA</i>                      | F: ggtaccCTTCCTGCGCATCAACGAT<br>R: aagcttTCAATAAATGGCCCGACAC                                                                                                | This work                 |
| LT152                                                             | TOP10 / pRKlac290- <i>PhfsJ</i>                      | F:<br>aaaaaagaattcACCCCAAGGCCACGCCAGAA<br>R:<br>aaaaaatctagaGGCCACCAGGCGGCCAGAA                                                                             | This work                 |
| FC1101                                                            | TOP10 / pPR9TT                                       | Plasmid for <i>lacZ</i> transcriptional and translational fusions                                                                                           | (Santos et al., 2001)     |
| pAF429                                                            | TOP10 / pPR9TT- <i>PhfiA</i> (a,b)                   | ggtaccCTTCCTGCGCATCAACGAT<br>aagcttTCAATAAATGGCCCGACAC                                                                                                      | This work                 |
| pAF431                                                            | TOP10 / pPR9TT- <i>PhfiA</i> (a-e)                   | ggtaccCTTCCTGCGCATCAACGAT<br>aagctTCGGCTCACTGACAACATC                                                                                                       | This work                 |

| <b>Heterologous protein expression plasmids</b>  |                                                                                                                                                         |                                                                                                                                                                                                                                                                                          |                         |
|--------------------------------------------------|---------------------------------------------------------------------------------------------------------------------------------------------------------|------------------------------------------------------------------------------------------------------------------------------------------------------------------------------------------------------------------------------------------------------------------------------------------|-------------------------|
| FC119                                            | TOP10 / pMal-c2x                                                                                                                                        | Plasmid to express proteins fused to maltose binding protein (MBP)                                                                                                                                                                                                                       | New England Biolabs     |
| FC2001                                           | TOP10 / pMal-c2x- <i>hfiA</i>                                                                                                                           | F: taatgaattcTGTCGGGCCATTTATTGAG<br>R: taatctgcagGTCGGTCTGCGCATAGT                                                                                                                                                                                                                       | This work               |
| FC274                                            | TOP10 / pETDuet                                                                                                                                         | Plasmid for co-expression of proteins from two different T7 promoters                                                                                                                                                                                                                    | Novagen                 |
| FC2011                                           | TOP10 / pETDuet(His- <i>hfsJ</i> )(MBP)                                                                                                                 | <i>hfsJ</i> amplified from genomic DNA<br>hfsJ F: taatgaattcCGTTCTGGGCGGGACCAT<br>hfsJ R: aatcaagcttCCCCTGAAGTTCAACAGCAT<br>MBP amplified from pMal-c2X- <i>hfiA</i><br>MBP F: TTCACGAGCACTTCACCAAC (NdeI)<br>MBP R: atatggtaccTCATGAAATCCTTCCCTCGATCC                                   | This work               |
| FC2003                                           | TOP10 / pETDuet(His- <i>hfsJ</i> )(MBP- <i>hfiA</i> )                                                                                                   | <i>hfsJ</i> amplified from genomic DNA<br>hfsJ F: taatgaattcCGTTCTGGGCGGGACCAT<br>hfsJ R: aatcaagcttCCCCTGAAGTTCAACAGCAT<br>MBP- <i>hfiA</i> amplified from pMal-c2X- <i>hfiA</i><br>MBP- <i>hfiA</i> -F: TTCACGAGCACTTCACCAAC (NdeI)<br>MBP- <i>hfiA</i> -R: aataggtaccGTGGTCTGCGCATAGT | This work               |
| <b>Bacterial two hybrid strains and plasmids</b> |                                                                                                                                                         |                                                                                                                                                                                                                                                                                          |                         |
| FC257                                            | BTH101 (F- <i>cya</i> -99, <i>araD</i> 139, <i>galE</i> 15, <i>galK</i> 16, <i>rpsL</i> 1 (Str resistant), <i>hsdR</i> 2, <i>mcrA</i> 1, <i>mcrB</i> 1) | Adenylate cyclase null strain for bacterial two-hybrid assay                                                                                                                                                                                                                             | (Karimova et al., 1998) |
| FC253                                            | TOP10 / pUT18c                                                                                                                                          | Parent plasmid to create fusions to the C-terminal end of adenylate cyclase T18                                                                                                                                                                                                          | (Karimova et al., 1998) |
| FC255                                            | TOP10 / pKT25                                                                                                                                           | Parent plasmid to create fusions to the C-terminal end of adenylate cyclase T25                                                                                                                                                                                                          | (Karimova et al., 1998) |
| FC254                                            | TOP10 / pUT18c- <i>zip</i>                                                                                                                              | Control plasmid with the adenylate cyclase T18 domain fused to the leucine zipper of GCN4                                                                                                                                                                                                | (Karimova et al., 1998) |
| FC256                                            | TOP10 / pKT25- <i>zip</i>                                                                                                                               | Control plasmid with the adenylate cyclase T25 domain fused to the leucine zipper of GCN4                                                                                                                                                                                                | (Karimova et al., 1998) |
| FC2006                                           | TOP10 / pKT25- <i>hfsJ</i>                                                                                                                              | F: atatctagaGGTTCTGGGCGGGACCATG<br>R: atatggtaccTAGCGCGCCGCTCGTT                                                                                                                                                                                                                         | This work               |
| FC2007                                           | TOP10 / pKT25- <i>hfsJ</i> (C260R)                                                                                                                      | Same as above with pAF495 as template                                                                                                                                                                                                                                                    | This work               |
| FC2009                                           | TOP10 / pKT25- <i>hfsJ</i> (C260R, W264R)                                                                                                               | Same as above with pAF497 as template                                                                                                                                                                                                                                                    | This work               |
| FC2128                                           | TOP10 / pKT25- <i>hfsJ</i> (L248R)                                                                                                                      | Same as above with pAF524 as template                                                                                                                                                                                                                                                    | This work               |
| FC2129                                           | TOP10 / pKT25- <i>hfsJ</i> (L256fs)                                                                                                                     | Same as above with pAF525 as template                                                                                                                                                                                                                                                    | This work               |
| FC2130                                           | TOP10 / pKT25- <i>hfsJ</i> (2X(F246-L255))                                                                                                              | Same as above with pAF526 as template                                                                                                                                                                                                                                                    | This work               |
| FC2010                                           | TOP10 / pUT18c- <i>hfiA</i>                                                                                                                             | F: atatggtaccGATGTCGGGCCATTTATTGAGC<br>R: atatgaattcTCAGCGCGGGGGGC                                                                                                                                                                                                                       | This work               |
| <b>Caulobacter crescentus strains</b>            |                                                                                                                                                         | <b>Source</b>                                                                                                                                                                                                                                                                            | <b>Figure</b>           |
| FC19                                             | Wild type CB15                                                                                                                                          | (Poindexter, 1964)                                                                                                                                                                                                                                                                       | 2, S2, S4, S6, 6        |
| FC423                                            | CB15 <i>xyiX</i> ::pMT585 <i>vanR</i> ::pMT528                                                                                                          | (Purcell et al., 2007)                                                                                                                                                                                                                                                                   | 1, S1, S6               |
| FC438                                            | CB15 <i>xyiX</i> ::pMT585- <i>lovR</i> <i>vanR</i> ::pMT528- <i>lovK</i>                                                                                | (Purcell et al., 2007)                                                                                                                                                                                                                                                                   | 1, S1, 2, S6            |
| FC1289                                           | CB15 $\Delta$ <i>hfsA</i> <i>xyiX</i> ::pMT585 <i>vanR</i> ::pMT528                                                                                     | This work                                                                                                                                                                                                                                                                                | 1, S1                   |
| FC1290                                           | CB15 $\Delta$ <i>hfsA</i> <i>xyiX</i> ::pMT585- <i>lovR</i> <i>vanR</i> ::pMT528- <i>lovK</i>                                                           | This work                                                                                                                                                                                                                                                                                | 1, S1                   |
| FC1244                                           | CB15 $\Delta$ <i>sigT</i> <i>xyiX</i> ::pMT585 <i>vanR</i> ::pMT528                                                                                     | (Foreman et al., 2012)                                                                                                                                                                                                                                                                   | 1, S1                   |
| FC1247                                           | CB15 $\Delta$ <i>sigT</i> <i>xyiX</i> ::pMT585- <i>lovR</i> <i>vanR</i> ::pMT528- <i>lovK</i>                                                           | (Foreman et al., 2012)                                                                                                                                                                                                                                                                   | 1, S1                   |
| FC1949                                           | CB15 / pRKlac290- <i>PhfiA</i>                                                                                                                          | This work                                                                                                                                                                                                                                                                                | 1, 5, 6                 |
| FC1950                                           | CB15 <i>xyiX</i> ::pMT585 <i>vanR</i> ::pMT528 / pRKlac290- <i>PhfiA</i>                                                                                | This work                                                                                                                                                                                                                                                                                | 1                       |
| FC1951                                           | CB15 <i>xyiX</i> ::pMT585- <i>lovR</i> <i>vanR</i> ::pMT528- <i>lovK</i> / pRKlac290- <i>PhfiA</i>                                                      | This work                                                                                                                                                                                                                                                                                | 1                       |
| FC1398                                           | CB15 <i>xyiX</i> ::pMT680                                                                                                                               | This work                                                                                                                                                                                                                                                                                | 2, 5                    |
| FC1399                                           | CB15 <i>xyiX</i> ::pMT680- <i>hfiA</i>                                                                                                                  | This work                                                                                                                                                                                                                                                                                | 2                       |
| FC1365                                           | CB15 $\Delta$ <i>hfiA</i>                                                                                                                               | This work                                                                                                                                                                                                                                                                                | 2, S2, 6                |
| ACC349                                           | CB15 $\Delta$ <i>hfiA</i> <i>xyiX</i> ::pMT680                                                                                                          | This work                                                                                                                                                                                                                                                                                | 2                       |

|        |                                                                             |                                           |          |
|--------|-----------------------------------------------------------------------------|-------------------------------------------|----------|
| ACC272 | CB15 $\Delta hfiA$ <i>xyiX::pMT680-hfiA</i>                                 | This work                                 | 2        |
| FC1370 | CB15 <i>xyiX::pMT585-lovR vanR::pMT528-lovK xyiX::pMT680</i>                | This work                                 | 2        |
| FC1371 | CB15 <i>xyiX::pMT585-lovR vanR::pMT528-lovK xyiX::pMT680-hfiA</i>           | This work                                 | 2        |
| FC1986 | CB15 / pPR9TT                                                               | This work                                 | S2       |
| FC1987 | CB15 / pPR9TT- <i>PhfiA(a,b)</i>                                            | This work                                 | S2       |
| FC1988 | CB15 / pPR9TT- <i>PhfiA(a-e)</i>                                            | This work                                 | S2       |
| FC1990 | CB15 <i>hfiA</i> ( $\Delta$ codonC)                                         | This work                                 | S2       |
| FC1991 | CB15 <i>hfiA</i> ( $\Delta$ codonD)                                         | This work                                 | S2       |
| FC1992 | CB15 <i>hfiA</i> ( $\Delta$ codonE)                                         | This work                                 | S2       |
| FC1993 | CB15 <i>hfiA</i> ( $\Delta$ codonC,D)                                       | This work                                 | S2       |
| FC1994 | CB15 <i>hfiA</i> ( $\Delta$ codonC,E)                                       | This work                                 | S2       |
| FC1995 | CB15 <i>hfiA</i> ( $\Delta$ codonD,E)                                       | This work                                 | S2       |
| FC1997 | CB15 <i>hfiA</i> ( $\Delta$ codonC,D,E )                                    | This work                                 | S2       |
| FC1934 | CB15 / pMT805                                                               | This work                                 | 3        |
| FC1935 | CB15 / pMT805- <i>hfiA</i> (sup256 parent strain)                           | This work                                 | 3        |
| FC1936 | CB15 <i>hfiA::pMT581-Pxyi-hfiA xyiX::pMT680-hfiA</i> (sup261 parent strain) | This work                                 | 3        |
| FC1943 | CB15 sup256-39                                                              | This work                                 | 3        |
| FC1944 | CB15 sup261-15                                                              | This work                                 | 3        |
| FC1945 | CB15 sup256-112                                                             | This work                                 | Table S1 |
| FC1946 | CB15 sup256-177                                                             | This work                                 | Table S1 |
| FC1947 | CB15 sup256-185                                                             | This work                                 | Table S1 |
| FC1974 | CB15 $\Delta hfsJ$                                                          | This work                                 | 3, S4    |
| FC1975 | CB15 <i>hfsJ</i> (C260R)                                                    | This work                                 |          |
| FC1977 | CB15 <i>hfsJ</i> (C260R,W264R)                                              | This work                                 |          |
| FC2119 | CB15 <i>hfsJ</i> (L248R)                                                    | This work                                 |          |
| FC2120 | CB15 <i>hfsJ</i> (L256fs)                                                   | This work                                 |          |
| FC2121 | CB15 <i>hfsJ</i> (2X(F246-L255))                                            | This work                                 |          |
| FC1978 | CB15 <i>hfsJ</i> (C260R) / pMT805                                           | This work                                 | 3        |
| FC1981 | CB15 <i>hfsJ</i> (C260R) / pMT805- <i>hfiA</i>                              | This work                                 | 3        |
| FC1980 | CB15 <i>hfsJ</i> (C260R,W264R) / pMT805                                     | This work                                 | 3        |
| FC1983 | CB15 <i>hfsJ</i> (C260R,W264R) / pMT805- <i>hfiA</i>                        | This work                                 | 3        |
| ACC392 | CB15 <i>hfsJ</i> (L248R) / pMT805                                           | This work                                 | 3        |
| ACC393 | CB15 <i>hfsJ</i> (L248R) / pMT805- <i>hfiA</i>                              | This work                                 | 3        |
| ACC394 | CB15 <i>hfsJ</i> (L256fs) / pMT805                                          | This work                                 | 3        |
| ACC395 | CB15 <i>hfsJ</i> (L256fs) / pMT805- <i>hfiA</i>                             | This work                                 | 3        |
| ACC396 | CB15 <i>hfsJ</i> (2XF246-L255) / pMT805                                     | This work                                 | 3        |
| ACC397 | CB15 <i>hfsJ</i> (2XF246-L255) / pMT805- <i>hfiA</i>                        | This work                                 | 3        |
| FC2100 | CB15 <i>hfsJ</i> ( $\Delta$ codonA)                                         | This work                                 | S4       |
| FC2102 | CB15 <i>hfsJ</i> ( $\Delta$ codonB)                                         | This work                                 | S4       |
| FC380  | CB15 / pMT630                                                               | This work                                 | S4       |
| ACC371 | CB15 $\Delta hfsJ$ / pMT630                                                 | This work                                 | S4       |
| ACC372 | CB15 $\Delta hfsJ$ / pMT630- <i>hfsJ</i>                                    | This work                                 | S4       |
| FC646  | CB15 / pMT464                                                               | This work                                 | S4       |
| FC2090 | CB15 $\Delta hfsJ$ / pMT464                                                 | This work                                 | S4       |
| FC2019 | CB15 $\Delta hfsJ$ / pMT464- <i>wecG</i>                                    | This work                                 | S4       |
| FC2020 | CB15 $\Delta hfsJ$ / pMT464- <i>tagA</i>                                    | This work                                 | S4       |
| FC2021 | CB15 $\Delta hfsJ::pMT666-P_{hfsJ}$ - <i>hfsJ</i> - <i>venus</i>            | This work                                 | S4       |
| FC1952 | NA1000 / pRKlac290- <i>PhfiA</i>                                            | This work                                 | 5        |
| FC1953 | NA1000 <i>ctrA</i> (V88G) <i>ts</i> / pRKlac290- <i>PhfiA</i>               | Parent strain (Jacobs et al., 1999)       | 5        |
| FC1954 | NA1000 <i>ctrA</i> (T170I) <i>ts</i> / pRKlac290- <i>PhfiA</i>              | Parent strain (Quon et al., 1996)         | 5        |
| FC1955 | NA1000 <i>gcrA</i> $\Omega$ <i>xyi::gcrA</i> / pRKlac290- <i>PhfiA</i>      | Parent strain (Holtzendorff et al., 2004) | 5        |
| FC1961 | CB15 <i>xyiX::pMT680</i> / pRKlac290- <i>PhfiA</i>                          | This work                                 | 5        |
| FC1962 | CB15 <i>xyiX::pMT680-staR</i> / pRKlac290- <i>PhfiA</i>                     | This work                                 | 5        |
| FC1960 | CB15 $\Delta staR$ / pRKlac290- <i>PhfiA</i>                                | This work                                 | 5        |

|        |                                                                                                                         |                                   |    |
|--------|-------------------------------------------------------------------------------------------------------------------------|-----------------------------------|----|
| FC1963 | CB15 $\Delta$ <i>staR</i> <i>xyfX</i> ::pMT585 <i>vanR</i> ::pMT528 / pRKlac290- <i>PhfiA</i>                           | This work                         | 5  |
| FC1964 | CB15 $\Delta$ <i>staR</i> <i>xyfX</i> ::pMT585- <i>lovR</i> <i>vanR</i> ::pMT528- <i>lovK</i> / pRKlac290- <i>PhfiA</i> | This work                         | 5  |
| LT396  | NA1000 / pRKlac290- <i>PhfsJ</i>                                                                                        | This work                         | 5  |
| LT397  | NA1000 <i>ctrA(T170I)ts</i> / pRKlac290- <i>PhfsJ</i>                                                                   | Parent strain (Quon et al., 1996) | 5  |
| FC1972 | CB15 <i>xyfX</i> ::pMT680- <i>staR</i>                                                                                  | This work                         | 5  |
| FC1970 | CB15 $\Delta$ <i>staR</i>                                                                                               | This work                         | S6 |
| FC2071 | CB15 / pRKlac290- <i>PhfsJ</i>                                                                                          | This work                         | S7 |
